# Supplementary material for: TP53 Alterations Correlate with Response to VEGF/VEGFR Inhibitors: Implications for Targeted Therapeutics
Source: Oxford University Press journal article supplement (doi:10.1158/1535-7163.mct-16-0196), 2016-07-27
Supplement: 15357163mct160196-sup-164545_2_supp_3562298_g9gr40.docx [file 15357163mct160196-sup-164545_2_supp_3562298_g9gr40.docx]

**Supplementary Table S4: Next generation sequencing gene list (Foundation Medicine)** (N = 236 genes**a**)


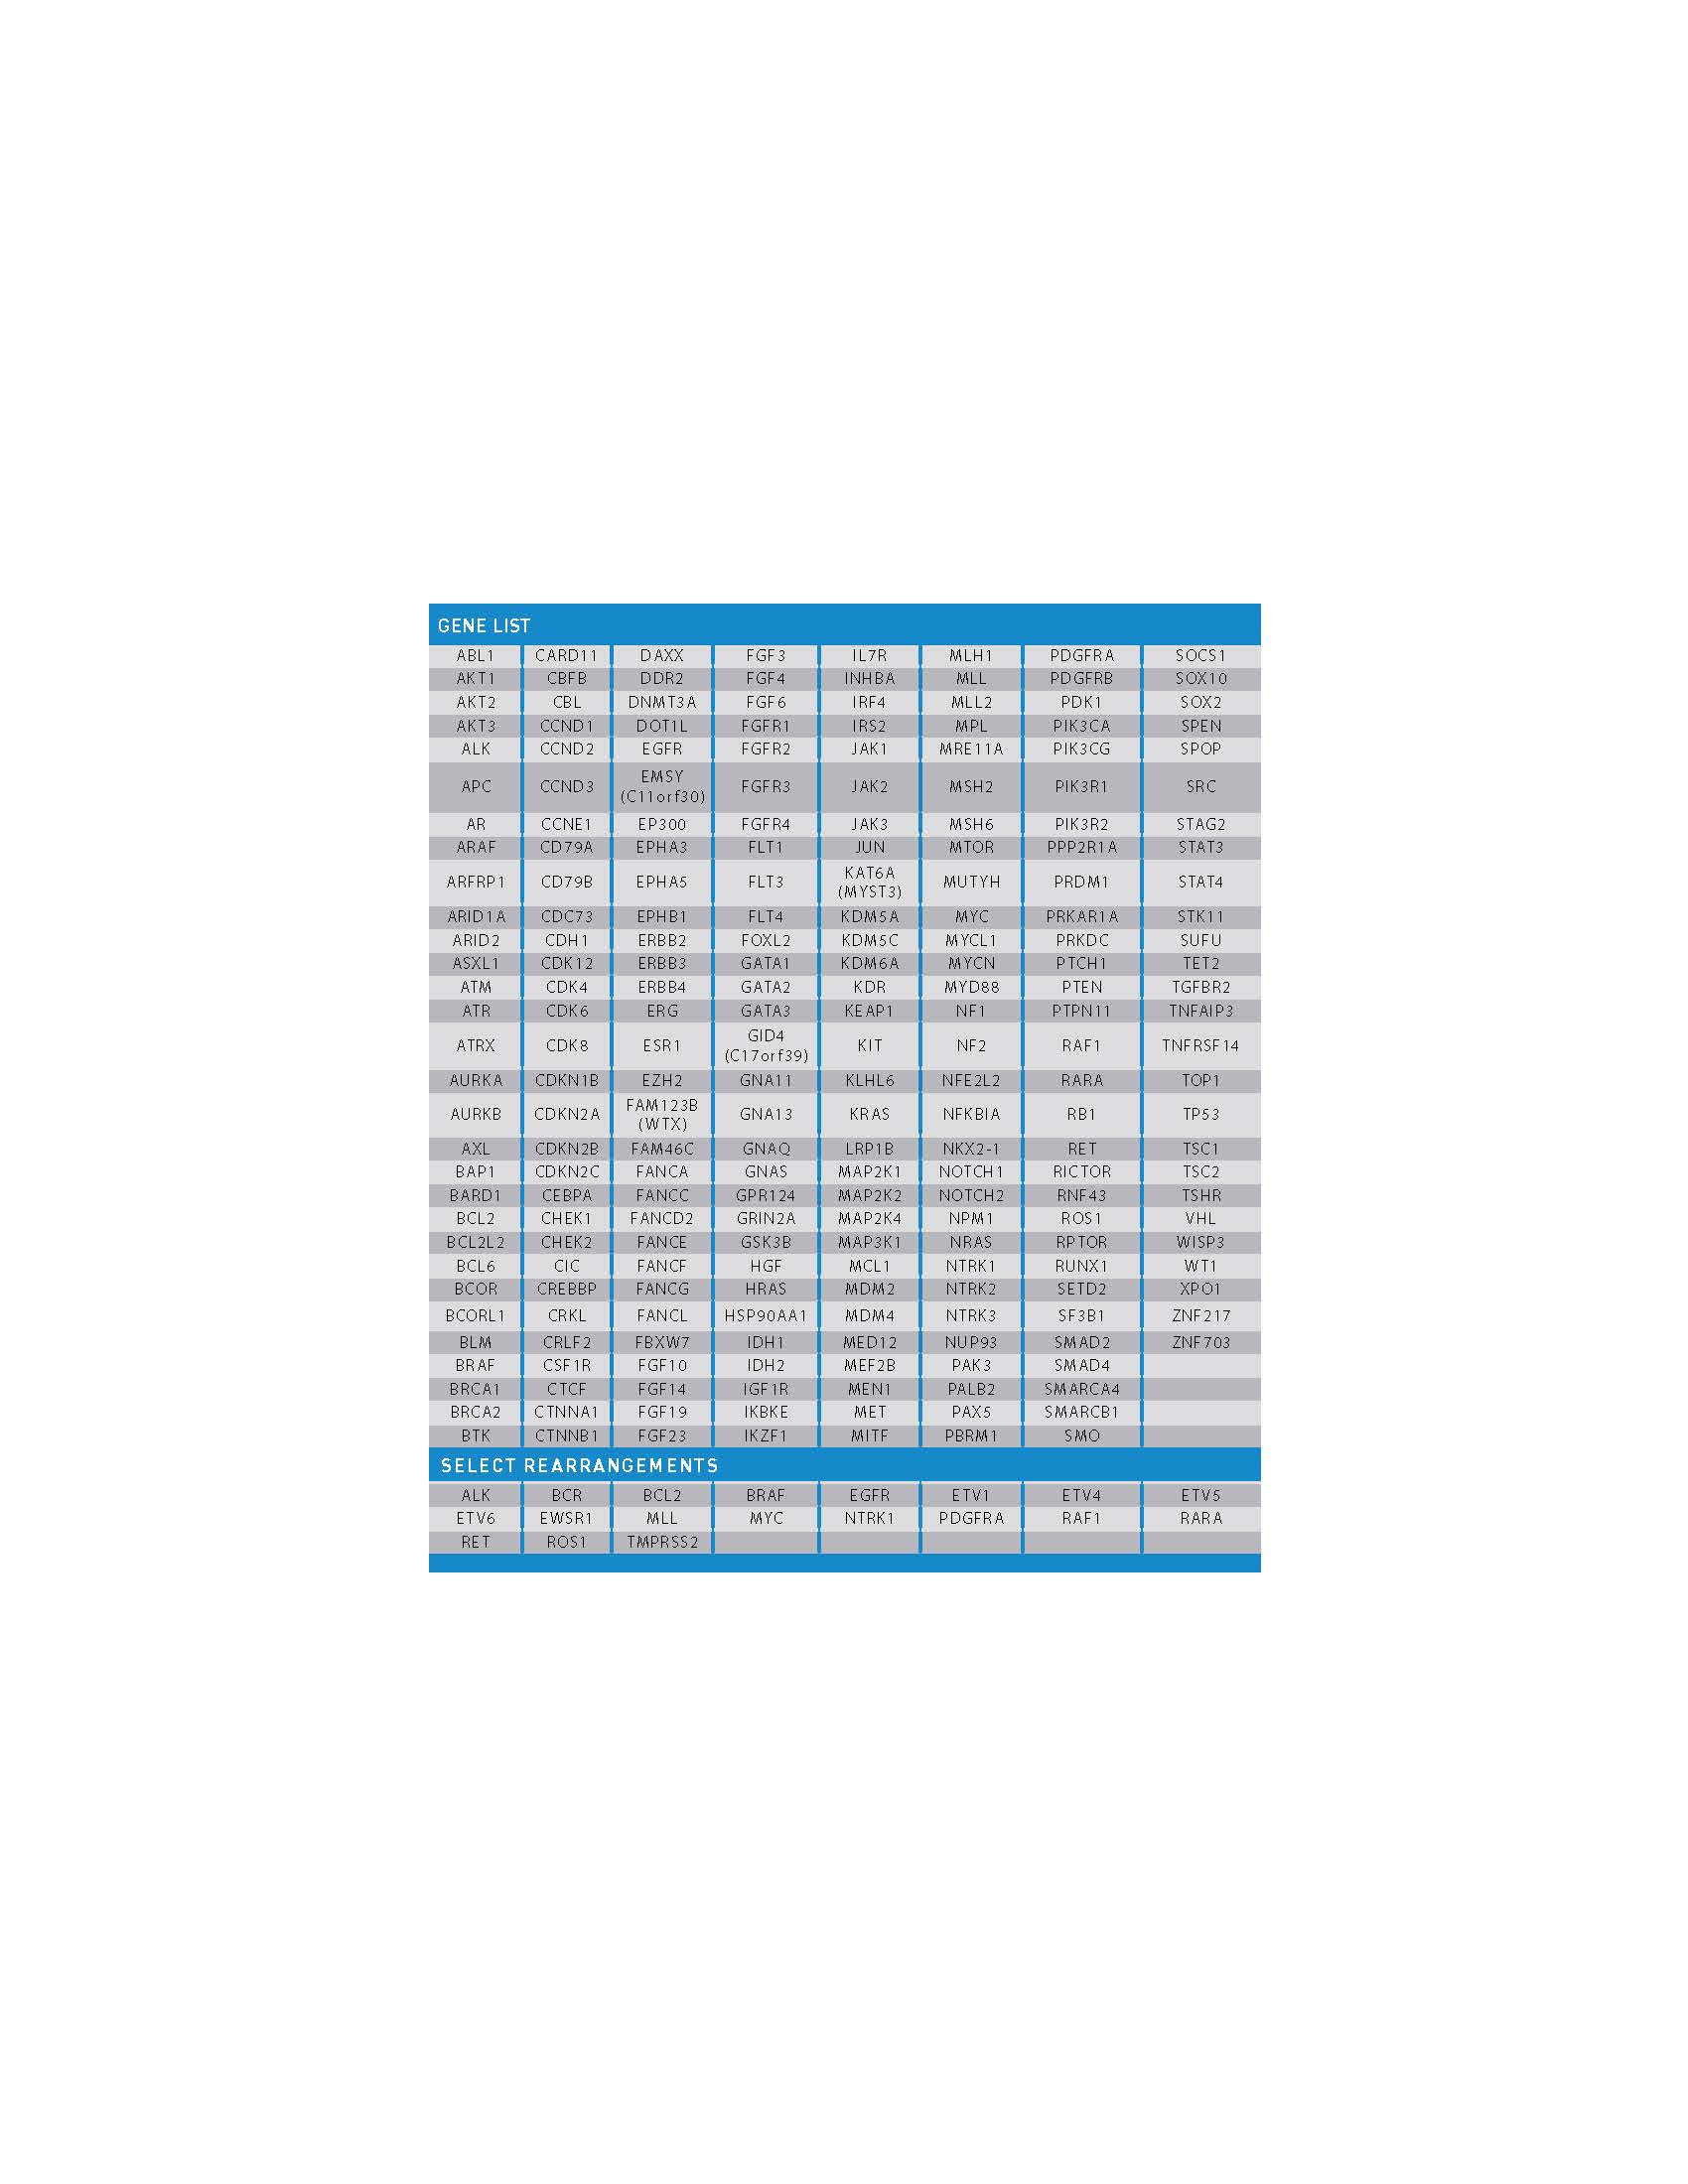


**a**As a pan-cancer test, FoundationOne™ is designed to interrogate the entire coding sequence of 236 cancer-related genes (3,769 exons) plus 47 introns from 19 genes often rearranged or altered in cancer. These genes are known to be somatically altered in human solid cancers based on recent scientific and clinical literature
